# Supplementary material for: Phase Ib evaluation of a self-adjuvanted protamine formulated mRNA-based active cancer immunotherapy, BI1361849 (CV9202), combined with local radiation treatment in patients with stage IV non-small cell lung cancer
Source: PubMed Central journal article supplement (PMC6368815; doi:10.1186/s40425-019-0520-5), 2019-02-08
Supplement: 40425_2019_520_MOESM2_ESM.pdf [file 40425_2019_520_MOESM2_ESM.pdf]

**Table S1. Peptide sequences of short class-I peptides.**

|                         | Antigen name  |            |            |           |             |           |
|-------------------------|---------------|------------|------------|-----------|-------------|-----------|
|                         | NY-ESO-1      | MAGE-C1    | MAGE-C2    | 5T4       | Survivin    | MUC-1     |
| <b>Peptide sequence</b> | SLLMWITQC     | ILFGISLREV | LLFGLALIEV | LTYVSFRNL | ELTLGEFLKL  | STAPPVHNV |
|                         | MLMAQEALAFI   | KVVEFLAML  | ALKDVEERV  | GAFEHLPSL | RISTFKNWPFL | LLLLTVLTV |
|                         | LMAQEALAFI    |            | FLAKLNNTV  | DLPAYVRNL | FLKLDRERA   | STAPPAHGV |
|                         | ASGPGGGAPR    |            | SESIKKKVL  | RLARLALVL | AYACNTSTL   | TLAPATEPA |
|                         | LAAQERRVPR    |            | ASSTLYLVF  | FLTGNQLAV | FFCFKELEGW  |           |
|                         | TVSGNILTIR    |            | KVAELVEFL  | PLADLSPFA | EPDLAQCFE   |           |
|                         | ELVRRILSR     |            |            |           | CPTENEPDL   |           |
|                         | APRGPHGGAASGL |            |            |           |             |           |
|                         | APRGVRMAV     |            |            |           |             |           |
|                         | MPFATPMEA     |            |            |           |             |           |
|                         | KEFTVSGNILTI  |            |            |           |             |           |
|                         | MPFATPMEA     |            |            |           |             |           |
|                         | LAMPFATPM     |            |            |           |             |           |
|                         | ARGPESRLL     |            |            |           |             |           |
|                         | LEFYLAMPF     |            |            |           |             |           |
