# Supplementary material for: Phase Ib evaluation of a self-adjuvanted protamine formulated mRNA-based active cancer immunotherapy, BI1361849 (CV9202), combined with local radiation treatment in patients with stage IV non-small cell lung cancer
Source: PubMed Central journal article supplement (PMC6368815; doi:10.1186/s40425-019-0520-5), 2019-02-08
Supplement: 40425_2019_520_MOESM3_ESM.pdf [file 40425_2019_520_MOESM3_ESM.pdf]

**Table S2. Screening failures.**

| Center | Subject ID | Age (yrs) | Gender | Race  | Subject treated? | Discontinuation date |
|--------|------------|-----------|--------|-------|------------------|----------------------|
| 102    | 102001     | 50        | Female | White | No               | 03JUL2014            |
| 104    | 104001     | 61        | Male   | White | No               | 08OCT2014            |
|        | 104002     | 53        | Male   | White | No               | 03NOV2014            |
| 301    | 301004     | 71        | Male   | White | No               | 21OCT2013            |
| 304    | 304001     | 65        | Female | White | No               | 14JAN2014            |
|        | 304003     | 78        | Female | White | No               | 01OCT2014            |
