# Supplementary material for: Phase Ib evaluation of a self-adjuvanted protamine formulated mRNA-based active cancer immunotherapy, BI1361849 (CV9202), combined with local radiation treatment in patients with stage IV non-small cell lung cancer
Source: PubMed Central journal article supplement (PMC6368815; doi:10.1186/s40425-019-0520-5), 2019-02-08
Supplement: 40425_2019_520_MOESM4_ESM.pdf [file 40425_2019_520_MOESM4_ESM.pdf]

**Table S3. Treatment exposure during the study.**

| Characteristic                | Stratum 1<br>(n=16) | Stratum 2<br>(n=8)       | Stratum 3<br>(n=2) | Overall<br>(n=26)        |
|-------------------------------|---------------------|--------------------------|--------------------|--------------------------|
| BI1361849                     |                     |                          |                    |                          |
| Successful administrations, n |                     |                          |                    |                          |
| Median (range)                | 7 (2–25)            | 7 (4–11)                 | 15 (5–25)          | 7 (2–25)                 |
| Treatment duration, days      |                     |                          |                    |                          |
| Median (range)                | 99 (8–806)          | 79 (29–163)              | 425 (57–793)       | 81 (8–806)               |
| Radiation                     |                     |                          |                    |                          |
| Total dose, Gy                |                     |                          |                    |                          |
| Median (range)                | 20 (20–20)          | 20 (20–40 <sup>a</sup> ) | 20 (20–20)         | 20 (20–40 <sup>a</sup> ) |
| Pemetrexed                    |                     |                          |                    |                          |
| Treatment duration, days      |                     |                          |                    |                          |
| Median (range)                | 45 (1–778)          | —                        | —                  | —                        |
| EGFR TKI                      |                     |                          |                    |                          |
| Dose adjustments, n (%)       | —                   | —                        | 1 (50)             | —                        |

<sup>a</sup>In one patient, two lesions were irradiated with 4 × 5 Gy on the same days; total exposure 20, not 40, Gy, as recorded in the database, results for which are shown above.

Abbreviations: TKI, tyrosine kinase inhibitor.
