# Supplementary material for: Phase Ib evaluation of a self-adjuvanted protamine formulated mRNA-based active cancer immunotherapy, BI1361849 (CV9202), combined with local radiation treatment in patients with stage IV non-small cell lung cancer
Source: PubMed Central journal article supplement (PMC6368815; doi:10.1186/s40425-019-0520-5), 2019-02-08
Supplement: 40425_2019_520_MOESM5_ESM.pdf [file 40425_2019_520_MOESM5_ESM.pdf]

**Table S4. Treatment-emergent adverse events occurring in  $\geq 10\%$  of patients overall by preferred term (safety analysis set).**

| Preferred term                        | Number (%) of patients |                    |                    |                   |
|---------------------------------------|------------------------|--------------------|--------------------|-------------------|
|                                       | Stratum 1<br>(n=16)    | Stratum 2<br>(n=8) | Stratum 3<br>(n=2) | Overall<br>(n=26) |
| Patients with at least 1 TEAE         | 16 (100.0)             | 8 (100.0)          | 2 (100.0)          | 26 (100.0)        |
| Injection site erythema               | 11 (68.8)              | 7 (87.5)           | 1 (50.0)           | 19 (73.1)         |
| Pyrexia                               | 9 (56.3)               | 4 (50.0)           | 2 (100.0)          | 15 (57.7)         |
| Decreased appetite                    | 8 (50.0)               | 4 (50.0)           | 0                  | 12 (46.2)         |
| Fatigue                               | 7 (43.8)               | 3 (37.5)           | 2 (100.0)          | 12 (46.2)         |
| Cough                                 | 5 (31.3)               | 4 (50.0)           | 0                  | 9 (34.6)          |
| Nausea                                | 3 (18.8)               | 4 (50.0)           | 2 (100.0)          | 9 (34.6)          |
| Vomiting                              | 5 (31.3)               | 1 (12.5)           | 1 (50.0)           | 7 (26.9)          |
| Chills                                | 5 (31.3)               | 1 (12.5)           | 1 (50.0)           | 7 (26.9)          |
| Influenza like illness                | 4 (25.0)               | 2 (25.0)           | 1 (50.0)           | 7 (26.9)          |
| Anemia                                | 6 (37.5)               | 0                  | 0                  | 6 (23.1)          |
| Dyspnea                               | 4 (25.0)               | 1 (12.5)           | 0                  | 5 (19.2)          |
| Arthralgia                            | 2 (12.5)               | 1 (12.5)           | 1 (50.0)           | 4 (15.4)          |
| Constipation                          | 3 (18.8)               | 1 (12.5)           | 0                  | 4 (15.4)          |
| Dizziness                             | 2 (12.5)               | 1 (12.5)           | 1 (50.0)           | 4 (15.4)          |
| Injection site pain                   | 2 (12.5)               | 2 (25.0)           | 0                  | 4 (15.4)          |
| Edema peripheral                      | 4 (25.0)               | 0                  | 0                  | 4 (15.4)          |
| General physical health deterioration | 1 (6.3)                | 0                  | 2 (100.0)          | 3 (11.5)          |
| Injection site discoloration          | 2 (12.5)               | 0                  | 1 (50.0)           | 3 (11.5)          |
| Injection site rash                   | 3 (18.8)               | 0                  | 0                  | 3 (11.5)          |
| Injection site reaction               | 3 (18.8)               | 0                  | 0                  | 3 (11.5)          |
| Neutrophil count decreased            | 3 (18.8)               | 0                  | 0                  | 3 (11.5)          |
| Myalgia                               | 3 (18.8)               | 0                  | 0                  | 3 (11.5)          |
| Headache                              | 2 (12.5)               | 0                  | 1 (50.0)           | 3 (11.5)          |
| Insomnia                              | 1 (6.3)                | 2 (25.0)           | 0                  | 3 (11.5)          |
| Pruritus                              | 2 (12.5)               | 1 (12.5)           | 0                  | 3 (11.5)          |
| Rash                                  | 2 (12.5)               | 0                  | 1 (50.0)           | 3 (11.5)          |

Abbreviation: TEAE, treatment-emergent adverse event.
