# Supplementary material for: Phase Ib evaluation of a self-adjuvanted protamine formulated mRNA-based active cancer immunotherapy, BI1361849 (CV9202), combined with local radiation treatment in patients with stage IV non-small cell lung cancer
Source: PubMed Central journal article supplement (PMC6368815; doi:10.1186/s40425-019-0520-5), 2019-02-08
Supplement: 40425_2019_520_MOESM7_ESM.pdf [file 40425_2019_520_MOESM7_ESM.pdf]

**Table S5. Immune responders per assay at any post-baseline time point in different strata.**

| Stratum | First-line treatment  | ELISpot    | ICS                      |                          |                                              | IgM         | IgG          | Microarray* | Cellular    | Humoral      | Overall      |
|---------|-----------------------|------------|--------------------------|--------------------------|----------------------------------------------|-------------|--------------|-------------|-------------|--------------|--------------|
|         |                       |            | CD4 <sup>+</sup> T cells | CD8 <sup>+</sup> T cells | CD4 <sup>+</sup> or CD8 <sup>+</sup> T cells |             |              |             |             |              |              |
| 1       | Platinum + pemetrexed | 2/7 (28.6) | 5/15 (33.3)              | 2/15 (13.3)              | 6/15 (40.0)                                  | 5/15 (33.3) | 14/15 (93.3) | 8/14 (57.1) | 7/15 (46.7) | 14/15 (93.3) | 14/15 (93.3) |
| 2       | Platinum-based        | 0/3 (0)    | 1/8 (12.5)               | 2/8 (25.0)               | 2/8 (25.0)                                   | 1/8 (12.5)  | 5/8 (62.5)   | 2/8 (25.0)  | 2/8 (25.0)  | 5/8 (62.5)   | 6/8 (75.0)   |
| 3       | EGFR TKI              | 0/0 (0)    | 1/2 (50.0)               | 0/2 (0)                  | 1/2 (50.0)                                   | 1/2 (50.0)  | 0/2 (50.0)   | 2/2 (100)   | 1/2 (50.0)  | 1/2 (50.0)   | 1/2 (50.0)   |

The data displayed in the body of the table show the numbers of responders/the total numbers of patient samples analyzed (percentage responders). Cellular immune responses were determined ex vivo by ELISpot assay and ICS. Antigen-specific antibodies were determined by enzyme-linked immunosorbent assay (ELISA). Definitions of immune responders, both cellular and humoral, included criteria of two-fold increases in immune response criteria over baseline (Day 1) as well as over background.

Abbreviations: TKI, tyrosine kinase inhibitor; ELISpot, enzyme-linked immunosorbent spot; Ig, immunoglobulin; ICS, intracellular cytokine staining

\* Seromic profiling, using the Seramatrix NSCLC-specific antigen microarray, was performed to investigate broadening of humoral immunity. The numbers displayed refer to patients with broadening of the antibody repertoire against antigens not covered by B11361849/total number of patients analysed.
