# Supplementary material for: Phase Ib evaluation of a self-adjuvanted protamine formulated mRNA-based active cancer immunotherapy, BI1361849 (CV9202), combined with local radiation treatment in patients with stage IV non-small cell lung cancer
Source: PubMed Central journal article supplement (PMC6368815; doi:10.1186/s40425-019-0520-5), 2019-02-08

**Figure S2. Heatmap showing broadening of the humoral immune response against antigens in several of the evaluated patients.**

Patient serum samples were exposed to the Lung Cancer Antigen Microarray (Seramatrix). Arrays were scanned at 635 nm using a microarray scanner (Molecular Devices) and data recorded as Relative Fluorescent Units. Signals greater than threshold were reported as positive. The threshold value was derived from background, where background =  $[2.5] \times [1\text{st quartile}]$ . Heat maps showing, for each time point and each patient, whether the patient had a signal higher than the 17230 threshold (orange fill). Antigens names covered by BI1361849 are displayed in blue/**bold**.

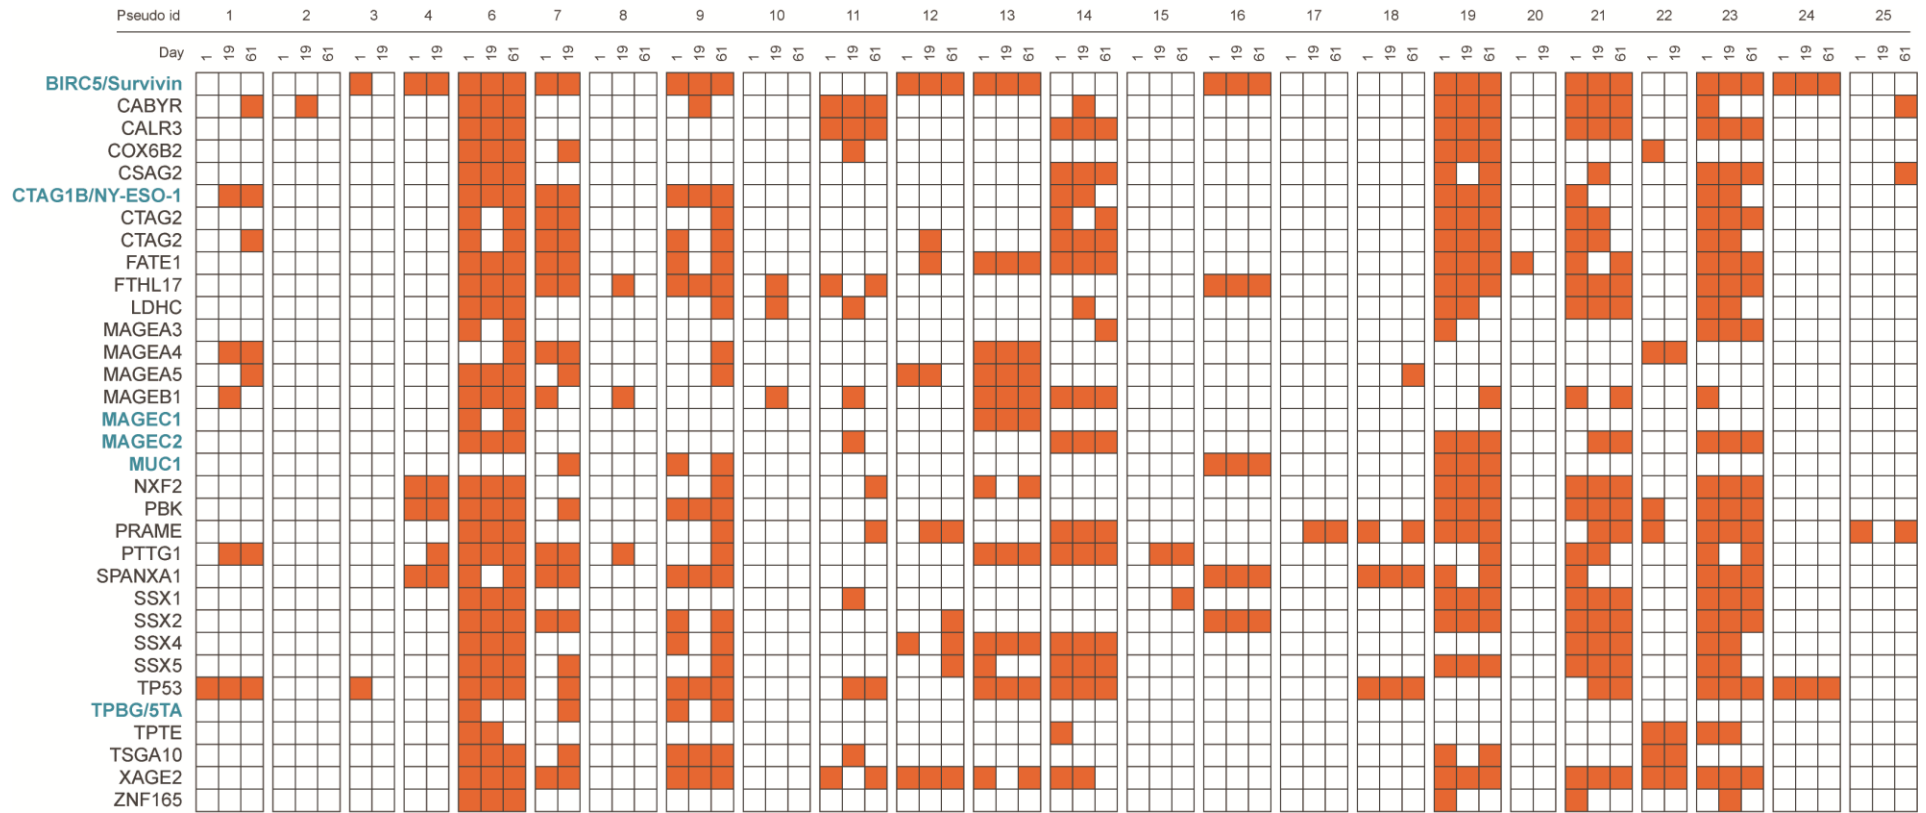

Supplement: 40425_2019_520_MOESM8_ESM.pdf [file 40425_2019_520_MOESM8_ESM.pdf]
