# Supplementary material for: Phase Ib evaluation of a self-adjuvanted protamine formulated mRNA-based active cancer immunotherapy, BI1361849 (CV9202), combined with local radiation treatment in patients with stage IV non-small cell lung cancer
Source: PubMed Central journal article supplement (PMC6368815; doi:10.1186/s40425-019-0520-5), 2019-02-08
Supplement: 40425_2019_520_MOESM9_ESM.pdf [file 40425_2019_520_MOESM9_ESM.pdf]

**Table S6. Best overall response by lesion type (safety analysis set).**

|                    | Patients with response, n (%)<br>[95% confidence interval] |                            |                           |                             |
|--------------------|------------------------------------------------------------|----------------------------|---------------------------|-----------------------------|
|                    | Stratum 1<br>(n=16)                                        | Stratum 2<br>(n=8)         | Stratum 3<br>(n=2)        | Overall<br>(n=26)           |
| Target lesions     |                                                            |                            |                           |                             |
| CR                 | 1 (6.3)<br>[0.16, 30.23]                                   | 0<br>[0.00, 36.94]         | 0<br>[0.00, 84.19]        | 1 (3.8)<br>[0.10, 19.64]    |
| PR                 | 0<br>[0.00, 20.59]                                         | 0<br>[0.00, 36.94]         | 0<br>[0.00, 84.19]        | 0<br>[0.00, 13.23]          |
| SD                 | 10 (62.5)<br>[35.43, 84.80]                                | 4 (50.0)<br>[15.70, 84.30] | 1 (50.0)<br>[1.26, 98.74] | 15 (57.7)<br>[36.92, 76.65] |
| PD                 | 3 (18.8)<br>[4.05, 45.65]                                  | 2 (25.0)<br>[3.19, 65.09]  | 1 (50.0)<br>[1.26, 98.74] | 6 (23.1)<br>[8.97, 43.65]   |
| NE                 | 2 (12.5)<br>[1.55, 38.35]                                  | 2 (25.0)<br>[3.19, 65.09]  | 0<br>[0.00, 84.19]        | 4 (15.4)<br>[4.36, 34.87]   |
| Non-target lesions |                                                            |                            |                           |                             |
| CR                 | 1 (6.3)<br>[0.16, 30.23]                                   | 0<br>[0.00, 36.94]         | 0<br>[0.00, 84.19]        | 1 (3.8)<br>[0.10, 19.64]    |
| Non-CR/non-PD      | 10 (62.5)<br>[35.43, 84.80]                                | 6 (75.0)<br>[34.91, 96.81] | 1 (50.0)<br>[1.26, 98.74] | 17 (65.4)<br>[44.33, 82.79] |
| PD                 | 4 (25.0)<br>[7.27, 52.38]                                  | 1 (12.5)<br>[0.32, 52.65]  | 1 (50.0)<br>[1.26, 98.74] | 6 (23.1)<br>[8.97, 43.65]   |
| NE                 | 1 (6.3)<br>[0.16, 30.23]                                   | 1 (12.5)<br>[0.32, 52.65]  | 0<br>[0.00, 84.19]        | 2 (7.7)<br>[0.95, 25.13]    |

Non-CR/non-PD: persistence of one or more non-target lesion(s) or/and maintenance of tumor markers (carcinoembryonic antigen, cytokeratin fragment 21-1) above the normal limits.

Abbreviations: CR, complete response; NE, not evaluable; PD, progressive disease; PR, partial response; SD, stable disease
