# Supplementary material for: Phase Ib evaluation of a self-adjuvanted protamine formulated mRNA-based active cancer immunotherapy, BI1361849 (CV9202), combined with local radiation treatment in patients with stage IV non-small cell lung cancer
Source: PubMed Central journal article supplement (PMC6368815; doi:10.1186/s40425-019-0520-5), 2019-02-08

**Figure S3. Survival following BI1361849 immunotherapy combined with local radiation treatment.**

(a) Kaplan–Meier progression-free survival curve (safety analysis set). (b) Kaplan–Meier overall survival curve (safety analysis set).

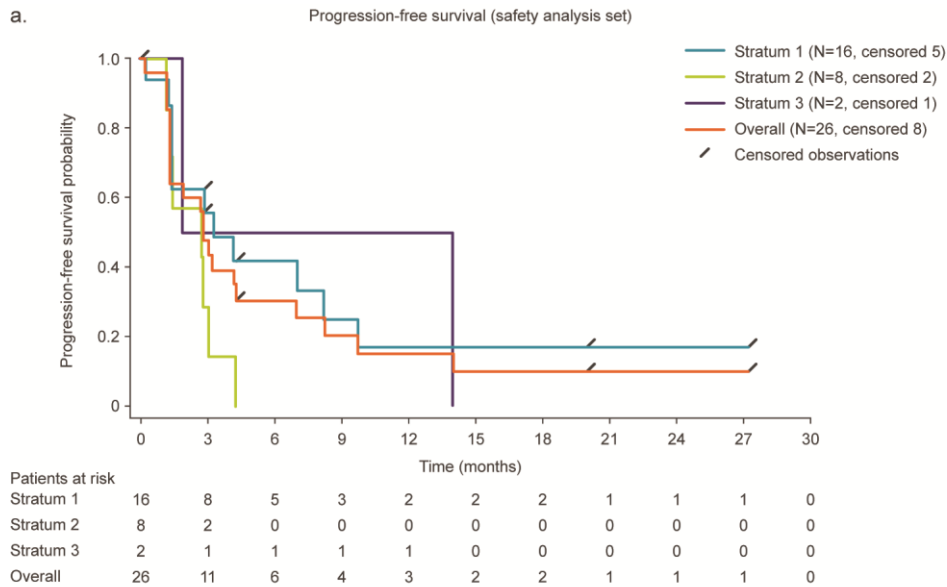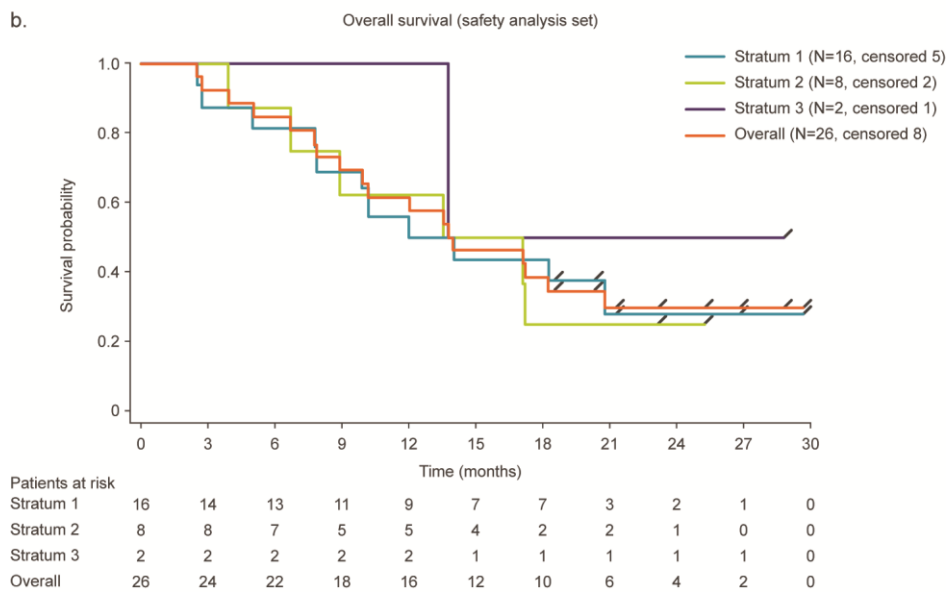

Supplement: 40425_2019_520_MOESM10_ESM.pdf [file 40425_2019_520_MOESM10_ESM.pdf]
