# Supplementary material for: Phase Ib evaluation of a self-adjuvanted protamine formulated mRNA-based active cancer immunotherapy, BI1361849 (CV9202), combined with local radiation treatment in patients with stage IV non-small cell lung cancer
Source: PubMed Central journal article supplement (PMC6368815; doi:10.1186/s40425-019-0520-5), 2019-02-08
Supplement: 40425_2019_520_MOESM11_ESM.pdf [file 40425_2019_520_MOESM11_ESM.pdf]

**Table S7. Name of the Ethics Committees that approved the study and approval numbers.**

| <b>Ethics committee name</b>                                                                                            | <b>Function</b> | <b>EC Ref No.</b>                   |
|-------------------------------------------------------------------------------------------------------------------------|-----------------|-------------------------------------|
| <b>Switzerland</b>                                                                                                      |                 |                                     |
| Ethikkommission beider Basel (later: Ethikkommission Nordwest- und Zentralschweiz)                                      | Leading EC      | 284/12                              |
| Kantonale Ethikkommission (KEK) Universitätsspital Zürich                                                               | Local EC        | KEK-ZH-Nr. 2013-0093                |
| Ethikkommission Kantonsspital St. Gallen                                                                                | Local EC        | EKSG 12/178                         |
| Kantonale Ethikkommission (KEK)                                                                                         | Local EC        | KEK-ZH-Nr. 2013-0143                |
| <b>Austria</b>                                                                                                          |                 |                                     |
| Ethikkommission der Medizinischen Universität Innsbruck                                                                 | Leading EC      | UN4898_LEK;320/2.2, 321/2.4; AN4898 |
| <b>Germany</b>                                                                                                          |                 |                                     |
| Ethik-Kommission des Fachbereichs Mediziner der Johann-Wolfgang-Goethe-Universität Frankfurt am Main                    | Leading EC      | 396/12                              |
| Ethik-Kommission der Landesärztekammer Rheinland-Pfalz                                                                  | Local EC        | 837.509.12; (8610)                  |
| Ethik-Kommission bei der Landesärztekammer Baden-Württemberg                                                            | Local EC        | B-AM-201-034 A3                     |
| Ethik-Kommission des Landes Berlin Landesamt für Gesundheit und Soziales                                                | Local EC        | 14/118 EK 15                        |
| Ethik-Kommission bei der Ärztekammer Niedersachsen Unterkommission zur Beurteilung med. Forschung am Menschen           | Local EC        | No own number (via leading EC )     |
| Ethik-Kommission der Ärztekammer Nordrhein                                                                              | Local EC        | 2014106                             |
| Ethik-Kommission der Ärztekammer Westfalen-Lippe und der mediz. Fakultät der Westfälischen Wilhelms Universität Münster | Local EC        | 2014-158-b-A                        |
| Ethik-Kommission der medizinischen Fakultät Heidelberg                                                                  | Local EC        | No own number (via leading EC)      |
